# Supplementary material
Source: PubMed Central journal article supplement (PMC7184912)

**A.**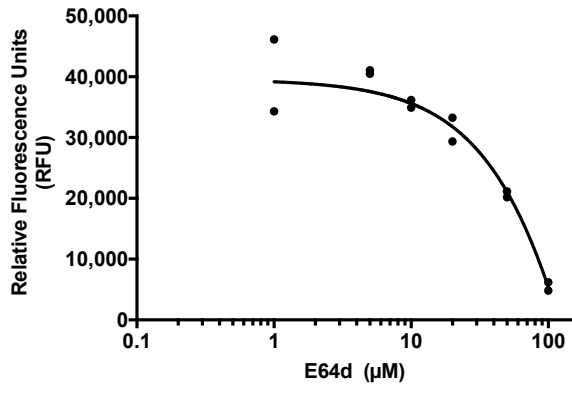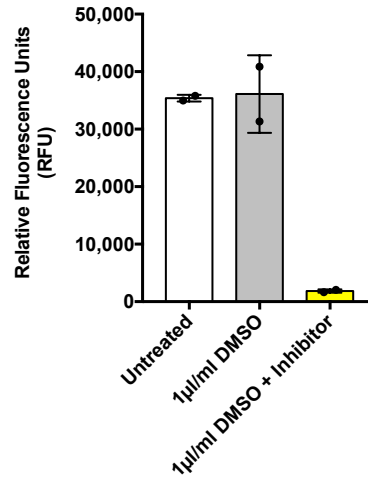**B.**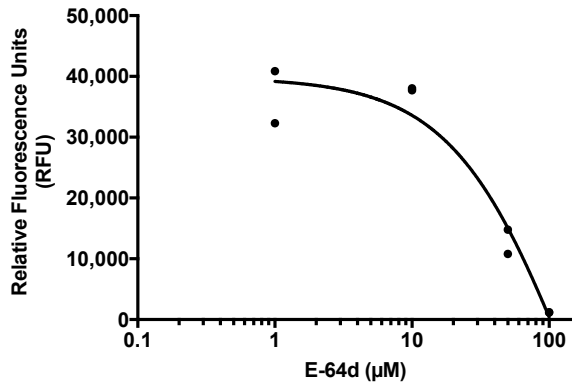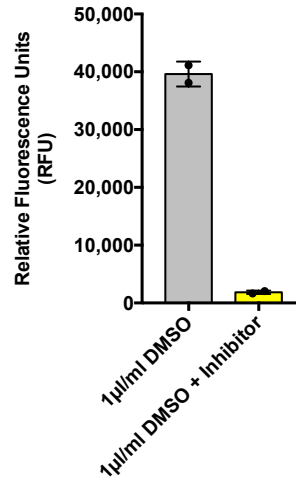

Supplement: jiz671_suppl_supplementary_figure_s1.pdf [file jiz671_suppl_supplementary_figure_s1.pdf]
